# Supplementary material for: Polarization-sensitive optical coherence tomography for estimating relative melanin content of autologous induced stem-cell derived retinal pigment epithelium
Source: PubMed Central journal article supplement (PMC7203130; doi:10.1038/s41598-020-64601-4), 2020-05-06
Supplement: 41598_2020_64601_MOESM1_ESM.pdf [file 41598_2020_64601_MOESM1_ESM.pdf]

## Supplementary Information

Polarization-sensitive optical coherence tomography for estimating relative melanin content of autologous induced stem-cell derived retinal pigment epithelium

Mitsuhiro Matsuzaki, Michiko Mandai, Masahiro Yamanari, Kota Totani, Mitsuhiro Nishida, Sunao Sugita , Tadao Maeda, Naoshi Koide, Seiji Takagi, Yasuhiko Hiramami, Noriko Miyamoto, Satoshi Sugiyama, Masayo Takahashi, Yasuo Kurimoto

A

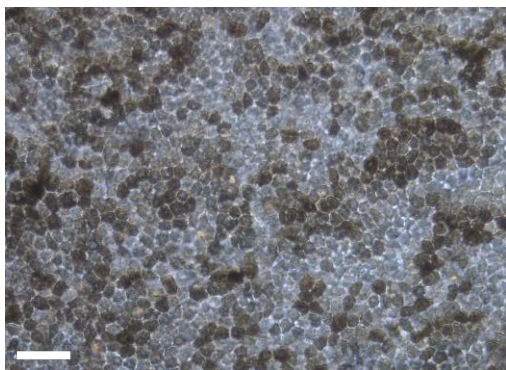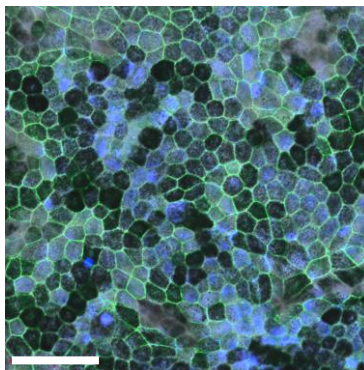Scale bars 50 $\mu$ m

B

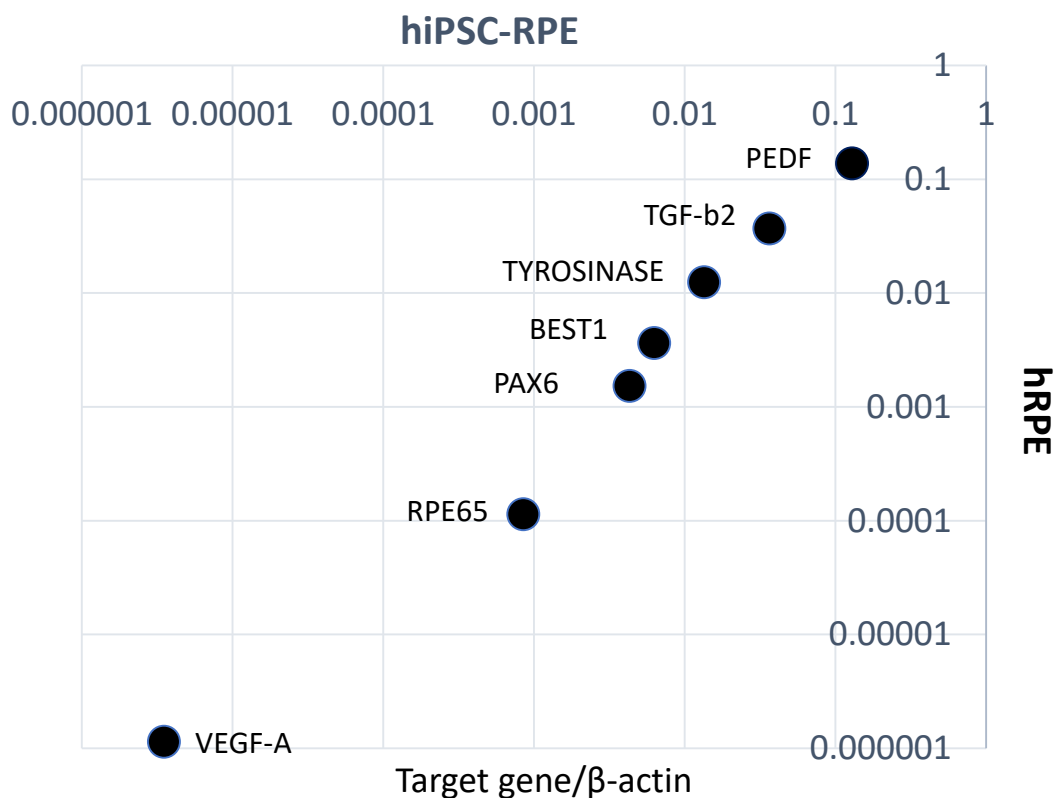

### Fig. S1 hiPSC-RPE differentiation and marker gene expression

hiPSC-RPE was differentiated from 253G1HA iPSC line as previously described [1,2]

**A** A typical cobblestone-like appearance of differentiated RPEs and the presence of tight junction marker ZO-1 by immuno-staining (Invitrogen Anti-ZO-1 Monoclonal (ZO1-1A12), Catalog # 33-9100, 1:500 with Antibody Diluent (Dako# S202230) at 4 °C overnight)

**B** hRPE and hiPSC-RPEs showed a similar expression pattern of RPE marker genes. iPS-RNA was extracted from hRPEs and hRPEs and after cDNA synthesis, target genes were amplified in triplicate by using primers for human PEDF, TGF-b2, RPE65, VEGF-A, tyrosinase, bestrophin-1, Pax6, and  $\beta$ -actin and were analyzed by LightCycler using qPCR Mastermix and Universal ProbeLibrary (all Roche Diagnostics, Tokyo, Japan) as previously described [3] (list of primers and Probes in Table S1). Relative mRNA expression was calculated with Relative Quantification software (Roche Diagnostics) by using an efficiency-corrected algorithm with standard curves and reference gene normalization against that of  $\beta$ -actin [3].

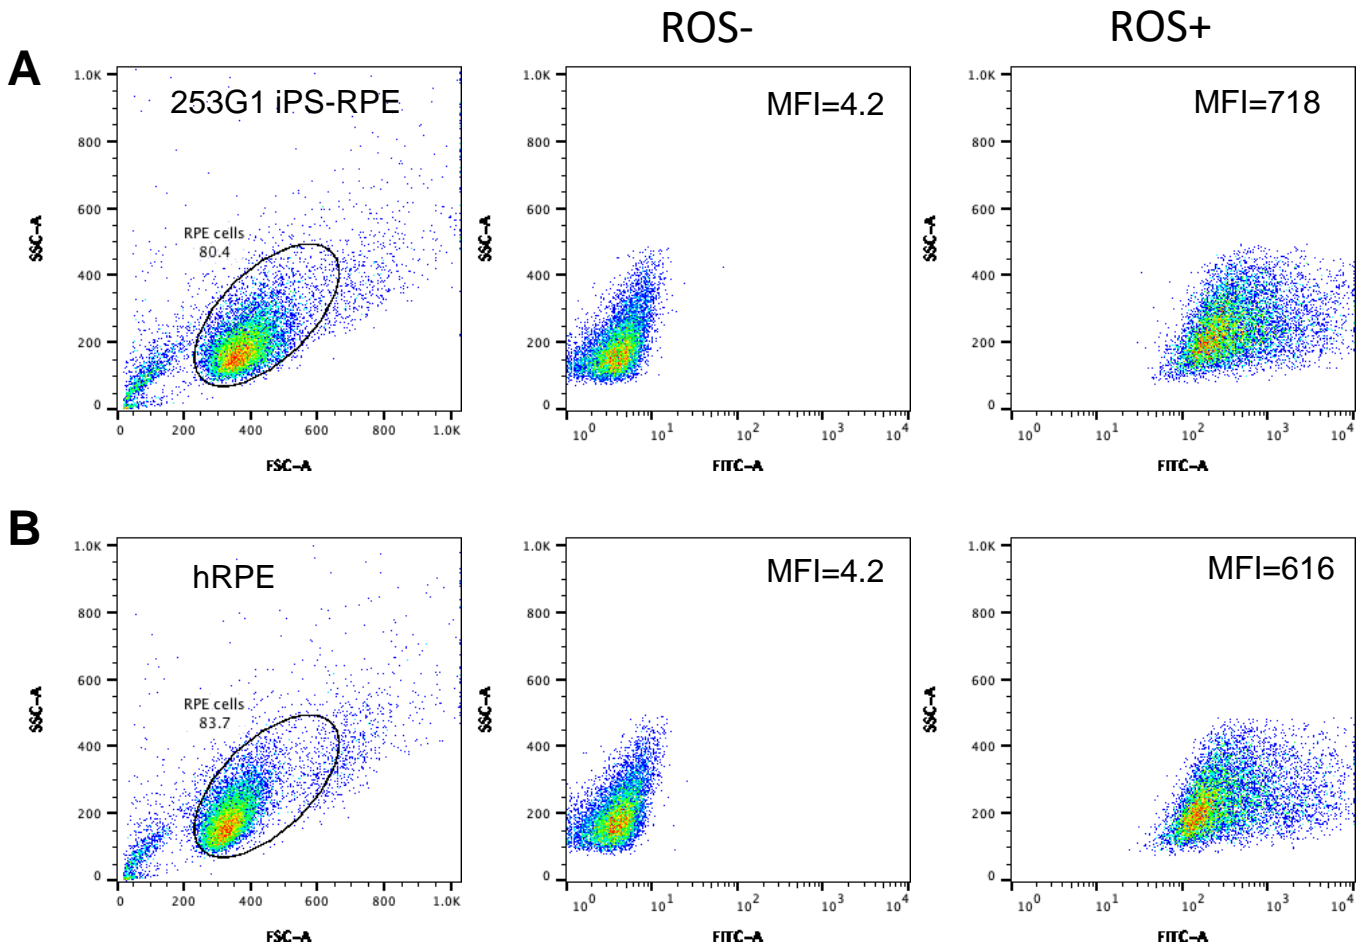

**Fig. S2 Phagocytosis of rod outer segments by hRPE cells and hiPSC-RPE cells**  
 Phagocytic function of iPS-RPE (A, 253G1HA line) cells and hRPE cells (B, Lonza) were examined as previously described[3]. In brief, RPEs were cultured in the presence (right column) or absence (middle column) of FITC-labeled porcine-shed photoreceptor rod outer segments (ROS, 10  $\mu\text{g}/\text{cm}^2$ ) for 24 hours at 37°C and FITC positivity was evaluated by flow cytometry analysis. Left panels show the cell gating in FACS. MFI, mean fluorescence intensity.

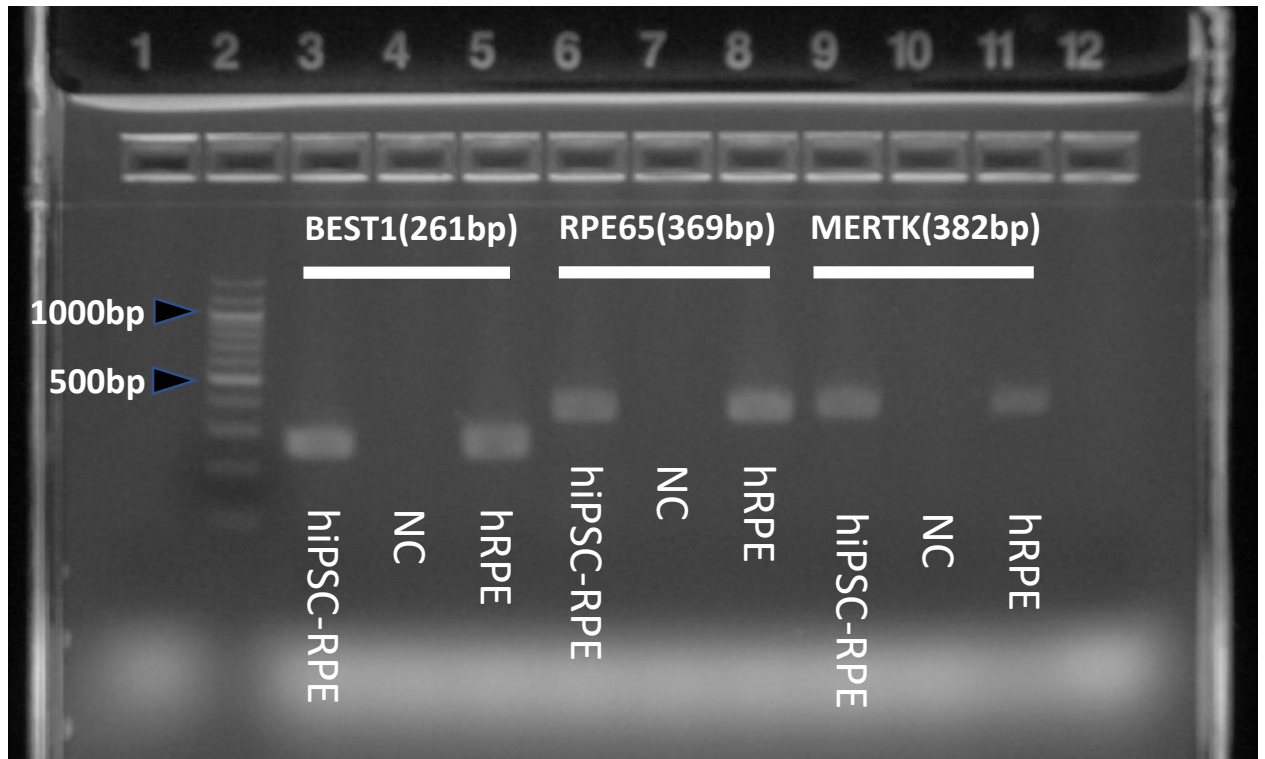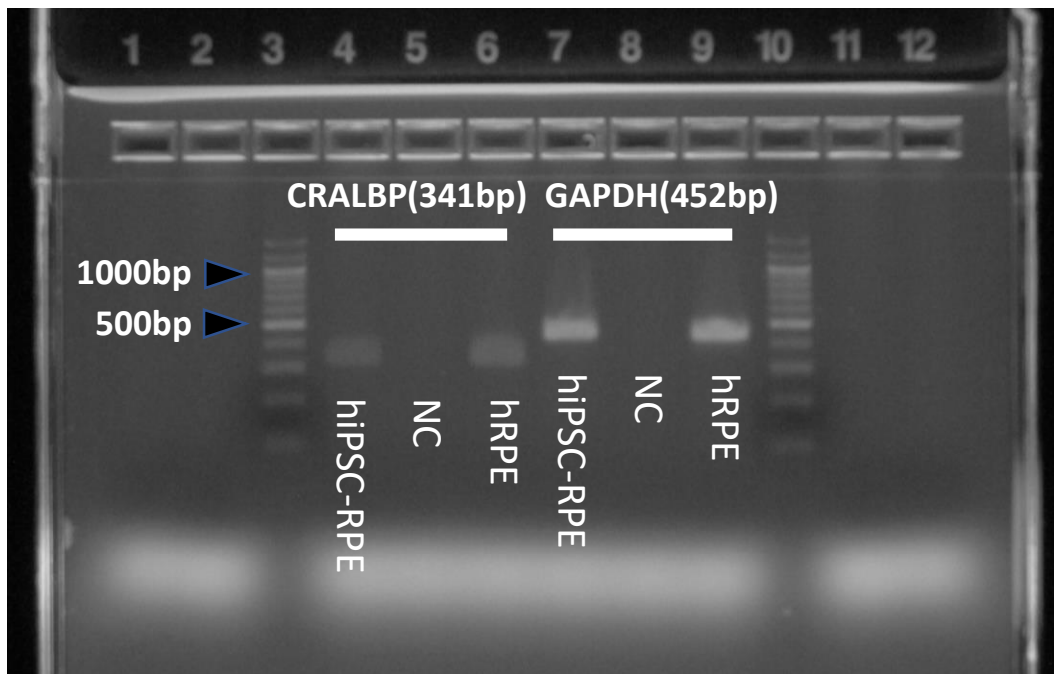

**Fig. S3** Marker gene expression by hiPSC-RPE cells from the same lot/passage used in Fig. 2

A part of the cells that were used to make hiPSC-RPE-sheet in Fig. 2 (the same lot) were plated on another dish and stocked upon reaching confluency. RNA was extracted from these hiPSC-RPE cells and was checked for RPE marker gene expressions with hRPE (Lonza) as a control by reverse transcription polymerase chain reaction as previously described(1,2). The pairs of primers used here for each gene are listed on Table S2. NC negative control with water template.

**Table S1 List of primers and probes for RPE marker genes used in Fig. S1**

|            | Forward Primers                                      | Reverse Primers         | Probe#* |
|------------|------------------------------------------------------|-------------------------|---------|
| PEDF       | gtgtggagctgcagcgat                                   | tccaatgcagaggagtagca    | #57     |
| VEGF-A     | cgcaagaaatcccgtataa                                  | aatgctttctccgctctga     | #1      |
| TGF-b 2    | ccaagggtacaatgccaac                                  | cagatgcttctggattatggatt | #67     |
| RPE65      | caatgggtttctgattgtgga                                | ccagttctcacgtaaattggcta | #84     |
| Best1      | tcttcacgttctgcagttc                                  | tcctctcaaaggggtgat      | #41     |
| Pax6       | ggcacacacacattaacacactt                              | ggtgtgtgagagcaattctcag  | #9      |
| Tyrosinase | gctgccaatttcagctttaga                                | ccgctatcccagtaagtgga    | #47     |
| beta-actin | ccaaccgcgagaagatga                                   | ccagaggcgtacagggatag    | #64     |
|            | probe* probes from the Roche Universal Probe Library |                         |         |

**Table S2 List of primers for RPE marker genes used in Fig. S3**

|          | primer sequence       |
|----------|-----------------------|
| BEST1-F  | TAGAACCATCAGCGCCGTC   |
| BEST1-R  | TGAGTGTAGTGTGTATGTTGG |
| RPE65-F  | TCCCAATACAACCTGCCACT  |
| RPE65-R  | CCTGGCATTGAGAATCAGG   |
| CRALBP-F | GAGGGTGCAAGAGAAGGACA  |
| CRALBP-R | TGCAGAAGCCATTGATTGA   |
| MERTK-F  | TCCTTGCCATCAGAAAAAG   |
| MERTK-R  | CATTGGGTGGCTGAAGTCT   |
| GAPDH-F  | ACCACAGTCCATGCCATCAC  |
| GAPDH-R  | TCCACCACCCTGTTGCTGTA  |

## References

- 1 Kamao, H. *et al.* Objective evaluation of the degree of pigmentation in human induced pluripotent stem cell-derived RPE. *Invest. Ophthalmol. Vis. Sci.* **55**, 8309-8318 (2014).
- 2 Mandai, M. *et al.* Autologous induced stem-cell-derived retinal cells for macular degeneration. *N. Engl. J. Med.* **376**, 1038-1046 (2017).
- 3 Sugita, S. *et al.* Inhibition of T-cell activation by retinal pigment epithelial cells derived from induced pluripotent stem cells. *Invest Ophthalmol. Vis. Sci.* **56**,1051-1062 (2015).
